# Supplementary material
Source: publisher site journal article supplement (https://www.dovepress.com/article/141851)
Supplement: Supplementary file 2 [file get_supplementary_file.php]

## **SUPPLEMENTARY MATERIAL 2: DETAILS ON ANALYSIS**

### Relative attribute importance

The relative importance of an attribute ( $\text{Imp}_{\text{Attribute}}$ ), conditional upon the attributes and levels used in this study, was calculated as the utility difference between the best and worst levels of an attribute ( $\text{UD}_{\text{Attribute}}$ ), divided by the sum of utility differences for all attributes in a 100% scale:

$$\text{Imp}_{\text{Attribute}} = 100\% * \text{UD}_{\text{Attribute}} / \sum_z \text{UD}_z$$

where  $\sum_z \text{UD}_z$  denotes the sum of utility differences of all product attributes. This was calculated only for potential adaptors using the estimates from the rank-ordered logit model.

### Uptake calculation

The probability of uptake of a specific injection A relative to eye drops for potential adaptors was calculated using the following formula which follows from the adoption of the logit model:

$$\text{Probability of uptake of option A} = \exp(V_{\text{optionA}}) / (\exp(V_{\text{optionA}}) + \exp(V_{\text{Eyedrops}}))$$

Uptake was assumed to be 0% for non-adopters. Overall uptake was calculated by taking a weighted average of uptake of the potential adaptors and non-adaptors (0% uptake).
