# Supplementary material
Source: publisher site journal article supplement (https://www.dovepress.com/article/141851)
Supplement: Supplementary file 3 [file get_supplementary_file.php]

**SUPPLEMENTARY MATERIAL 3: ESTIMATES**

**Rank-ordered estimates for potential adopters (N= 31)**

| <b>Attributes</b>                  | <b>Coefficient</b> | <b>Standard Error</b> | <b>p-value</b> |
|------------------------------------|--------------------|-----------------------|----------------|
| <b>Interval between injections</b> | -0.295             | 0.078                 | <0.001         |
| <b>Risk of complications</b>       |                    |                       |                |
| 0.10%                              | 0                  |                       |                |
| 0.01%                              | 1.476              | 0.214                 | <0.001         |
| 0%                                 | 2.397              | 0.255                 | <0.001         |
| <b>Annual out-of-pocket cost</b>   | -0.001             | 0.000                 | <0.001         |
| <b>Doctor recommendation</b>       |                    |                       |                |
| Doctor recommends                  | 0                  |                       |                |
| No recommendation                  | 0.628              | 0.177                 | <0.001         |
| <b>ASC for Eye drops</b>           | -0.899             | 0.284                 | 0.002          |
| <b>Log likelihood</b>              | -371               |                       |                |
